# Supplementary material
Source: Springer Nature journal article supplement (https://www.springermedizin.de/resource/supplementary/12891_2011_1292_MOESM2_ESM.pdf/9507556)
Supplement: MOESM2 [file 9507556]

N=775  
contacted by  
mail

N=364  
volunteered

Excluded: age (n=2);  
language (n=4); no  
functional problems  
(n=48); referral (n=22)

N=288  
t0 (inclusion)

Loss to follow-up: death  
(n=6); no motivation  
(n=17); Other medical  
or psychological  
problems of patient or  
partner (n=13);  
unknown (n=1); moved  
(n=1); incomplete /  
missing data (n=13)

N=237  
t3
